# Supplementary material for: Assessment of Exposure to Mycotoxins in Spanish Children through the Analysis of Their Levels in Plasma Samples
Source: PubMed Central journal article supplement (PMC7919644; doi:10.3390/toxins13020150), 2021-02-15
Supplement: toxins-13-00150-s001.pdf [file toxins-13-00150-s001.pdf]

# Supplementary Materials: Assessment of Exposure to Mycotoxins in Spanish Children through the Analysis of Their Levels in Plasma Samples

Beatriz Arce-López, Elena Lizarraga, Reyes López de Mesa and Elena González-Peñas

**Table S1.** Calibration curves for each of the analysed mycotoxins before and after enzymatic treatment.

| Mycotoxin | Range (ng/mL)      | LOD (ng/mL) | Before Enzymatic Treatment |                   |                    | After Enzymatic Treatment |                   |                   |      |
|-----------|--------------------|-------------|----------------------------|-------------------|--------------------|---------------------------|-------------------|-------------------|------|
|           |                    |             | R <sup>2</sup>             | Calibration Curve | Weight             | R <sup>2</sup>            | Calibration Curve | Weight            |      |
| Group I   | DOM-1              | 6.0-180.0   | 1.35                       | 0.9991            | y=18.53x - 37.58   | None                      | 0.9983            | y=17.23x + 2.36   | None |
|           | AFG2               | 0.8-24.0    | 0.35                       | 0.9967            | y=118.90 + 76.61   | None                      | 0.9987            | y=155.31 - 59.05  | None |
|           | AFM1               | 0.8-24.0    | 0.18                       | 0.9973            | y=89.25x + 58.70   | None                      | 0.9964            | y=102.06x + 0.58  | None |
|           | AFG1               | 0.3-9.0     | 0.07                       | 0.9914            | y=265.28x + 156.33 | None                      | 0.9984            | y=348.78x - 14.64 | None |
|           | AFB2               | 0.3-9.0     | 0.07                       | 0.9969            | y=275.95x + 69.75  | None                      | 0.9974            | y=319.86x - 46.42 | None |
|           | AFB1               | 0.2-6.0     | 0.04                       | 0.9962            | y=521.83x + 87.81  | None                      | 0.9990            | y=624.90x - 51.15 | None |
|           | HT-2               | 6.0-180.0   | 2.70                       | 0.9978            | y=13.73x + 47.75   | None                      | 0.9979            | y=11.56x - 19.68  | None |
|           | OTB                | 1.0-30.0    | 0.40                       | 0.9992            | y=183.82x - 62.10  | 1/x                       | 0.9909            | y=130.58x + 98.58 | 1/x  |
|           | T-2                | 1.0-30.0    | 0.20                       | 0.9970            | y=87.67x + 96.80   | None                      | 0.9990            | y=73.80x - 11.32  | None |
|           | ZEA                | 4.0-120.0   | 1.80                       | 0.9935            | y=21.80x + 136.51  | None                      | 0.9964            | y=21.85x - 90.44  | None |
|           | OTA-d <sub>5</sub> | 2.0-60.0    | 0.40                       | 0.9956            | y=56.46x - 11.59   | 1/x                       | 0.9982            | y=40.39x - 31.16  | None |
| STER      | 1.0-30.0           | 0.20        | 0.9970                     | y=118.10x + 94.60 | None               | 0.9930                    | y=136.82x - 74.18 | None              |      |
| Group II  | NIV                | 20.4-612.0  | 9.10                       | 0.9969            | y=1.39x - 9.45     | None                      | 0.9941            | y=1.21x - 27.45   | None |
|           | DON                | 8.72-361.6  | 1.94                       | 0.9994            | y=6.47x - 3.89     | None                      | 0.9968            | y=6.31x - 8.69    | None |
|           | FUS-X              | 7.0-210.0   | 1.95                       | 0.9984            | y=4.64x + 8.89     | None                      | 0.9944            | y=3.51x - 8.98    | None |
|           | NEO                | 0.8-24.0    | 0.18                       | 0.9944            | y=57.02x + 27.60   | None                      | 0.9952            | y=42.86x - 10.85  | None |
|           | 3-ADON             | 1.75-52.5   | 0.70                       | 0.9962            | y=20.48x + 5.92    | None                      | 0.9905            | y=15.91x + 24.90  | None |
|           | 15-ADON            | 2.72-81.6   | 1.20                       | 0.9990            | y=21.82x - 14.97   | None                      | 0.9961            | y=16.84x - 23.71  | None |
|           | DAS                | 0.7-21.0    | 0.15                       | 0.9982            | y=111.29x + 15.60  | None                      | 0.9970            | y=67.75x + 29.55  | None |

LOD: limit of detection.

**Table S2.** Statistical *p*-values on the occurrence of OTA in samples.

|    |    |    |         |      |   |         |   |    |         |   |   |    |   |
|----|----|----|---------|------|---|---------|---|----|---------|---|---|----|---|
| AE | PD | T  | 0.04*   |      |   | 1.8E-4* |   |    |         |   |   |    |   |
|    |    | B  |         |      |   | 0.84    |   |    |         |   |   |    |   |
|    |    | G  |         |      |   |         |   |    | 0.84    |   |   |    |   |
| PS | PS | T  | 0.82    |      |   |         |   |    | 1.8E-4* |   |   |    |   |
|    |    | B  |         |      |   | 0.99    |   |    |         |   |   |    |   |
|    |    | G  |         |      |   | 0.99    |   |    |         |   |   |    |   |
| BE | PD | T  | 3.5E-7* |      |   |         |   |    | 0.04*   |   |   |    |   |
|    |    | B  |         |      |   |         |   |    |         |   |   |    |   |
|    |    | G  |         |      |   |         |   |    |         |   |   |    |   |
| PS | PS | T  | 3.5E-7* |      |   | 0.82    |   |    |         |   |   |    |   |
|    |    | B  | 0.62    | 0.26 |   |         |   |    |         |   |   |    |   |
|    |    | G  | 0.62    | 0.26 |   |         |   |    |         |   |   |    |   |
|    |    | G  | B       | T    | G | B       | T | G  | B       | T | G | B  | T |
|    |    |    | PS      |      |   | PD      |   | PS |         |   |   | PD |   |
|    |    | BE |         |      |   |         |   | AE |         |   |   |    |   |

\*: statistical significance ( $p < 0.05$ , 95% CI). AE: after enzymatic treatment. BE: before enzymatic treatment. B: boys. G: girls. PS: healthy children. PD: children with digestive disorders. T: total.
